# Supplementary material
Source: publisher figshare collection journal article supplement (https://tandf.figshare.com/ndownloader/files/20047559)
Supplement: Supplementary file 1 [file 20047559]

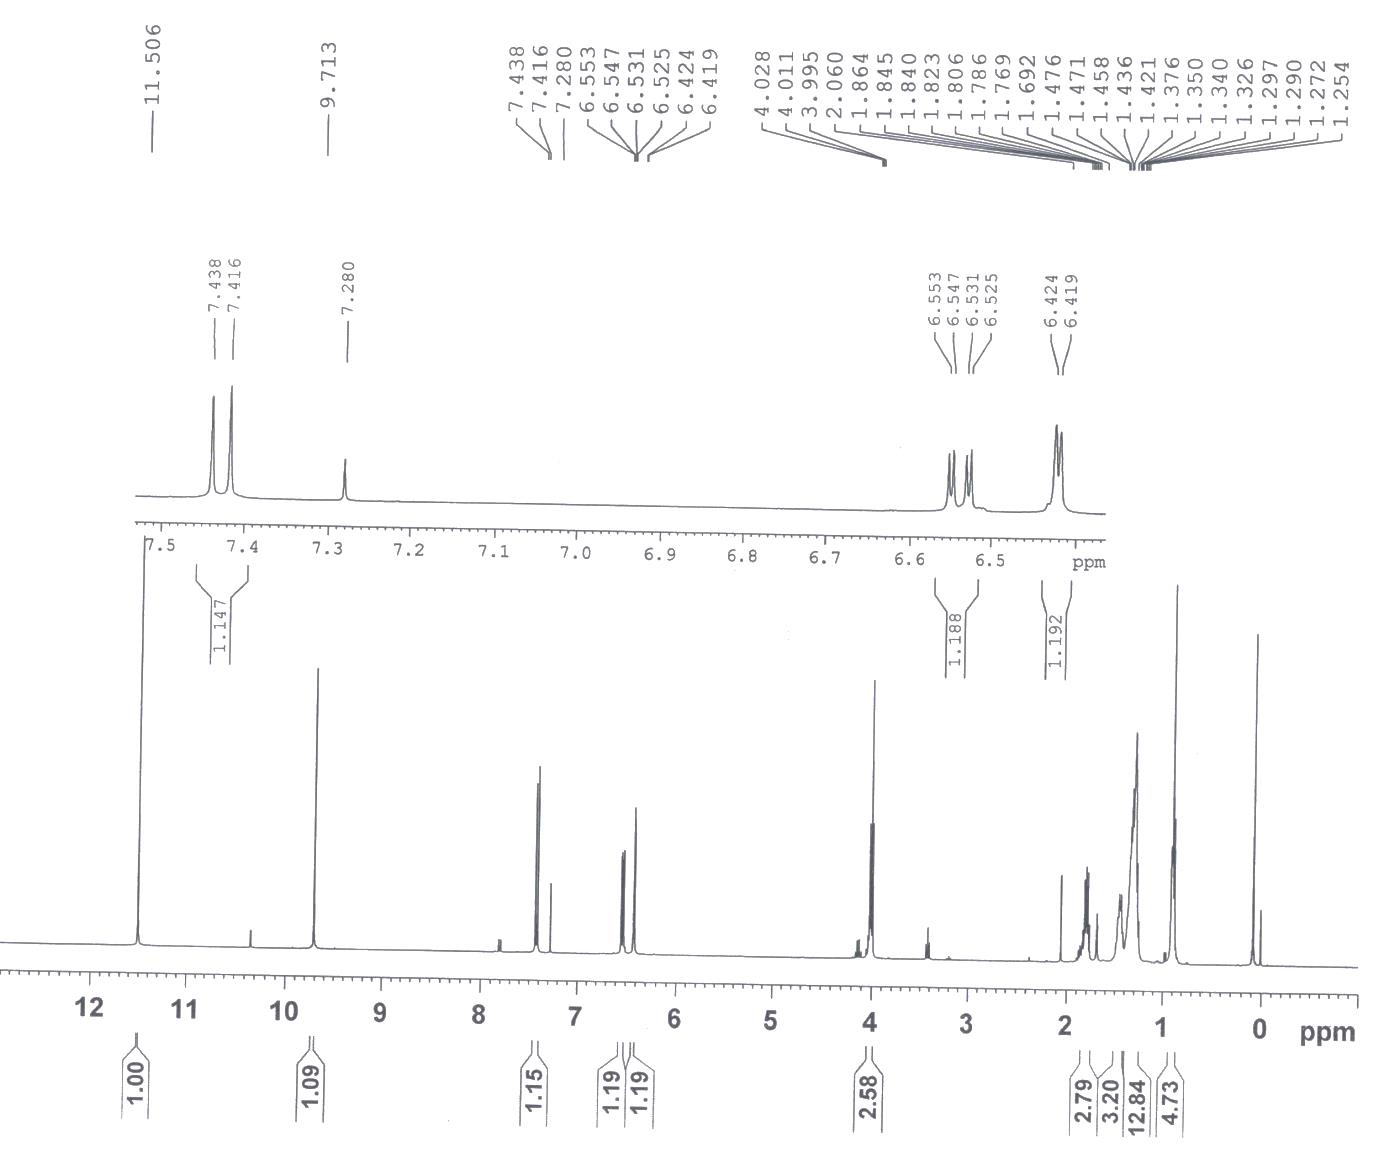


**Figure S1**. 1H NMR of 2-Hydroxy-4-(octyloxy)benzaldehyde.


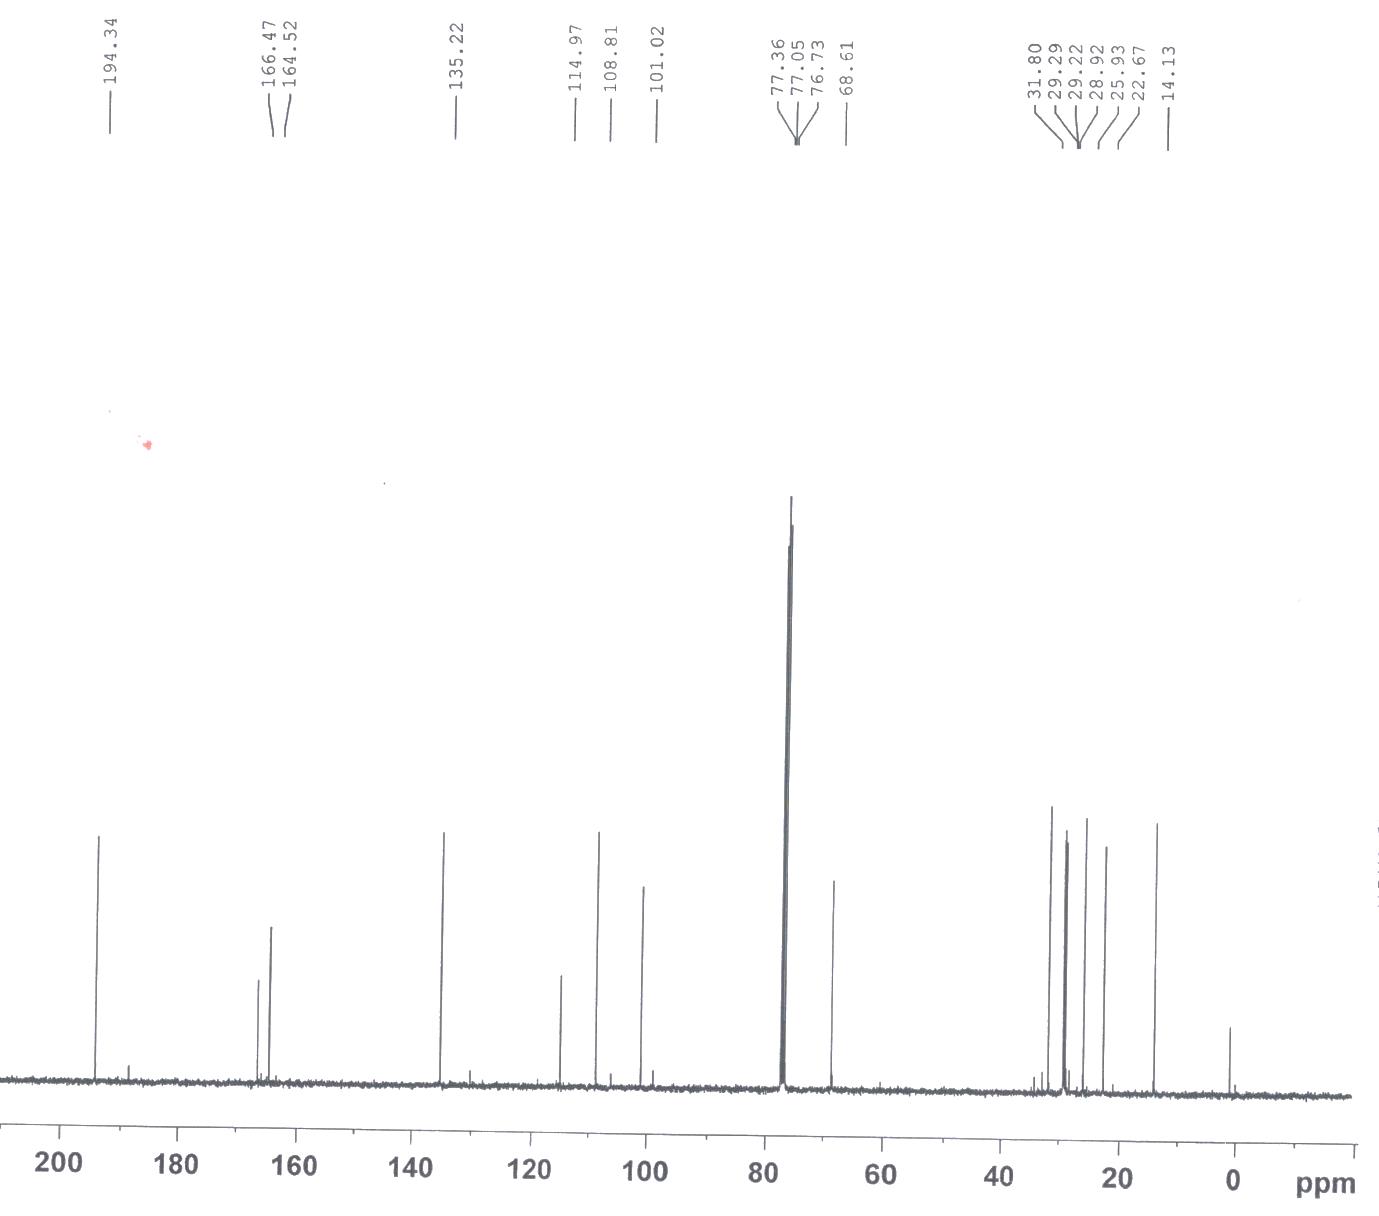


**Figure S2.** 13C NMR of 2-Hydroxy-4-(octyloxy)benzaldehyde.


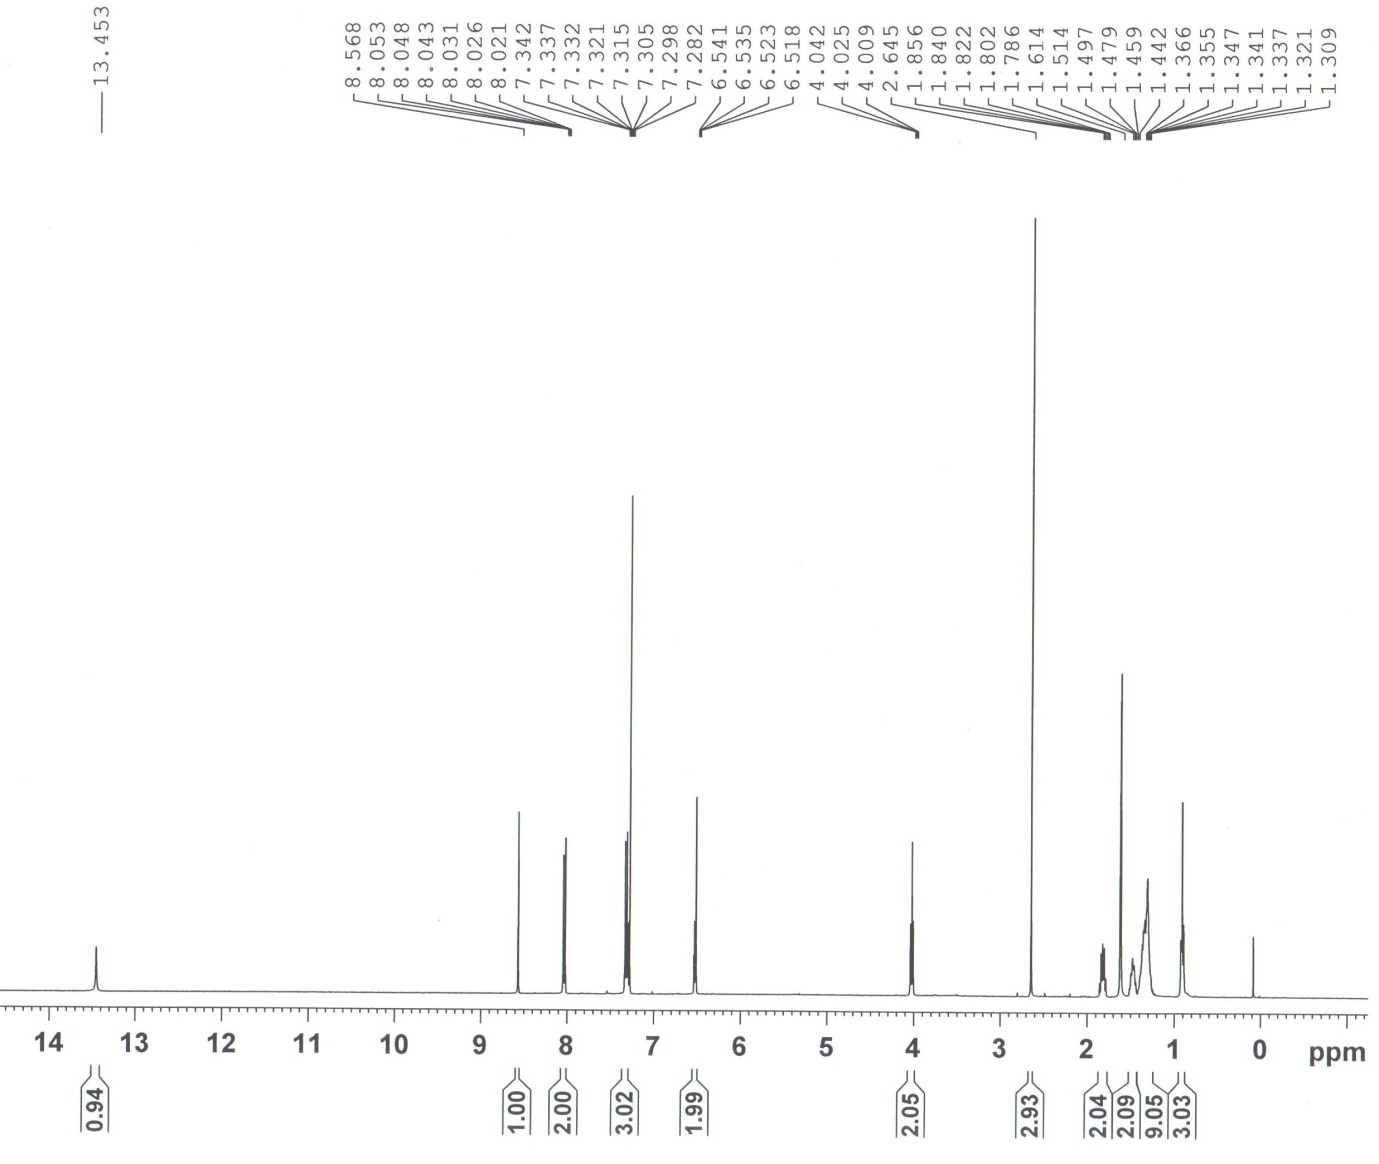


**Figure S3**. 1H NMR of A-8.


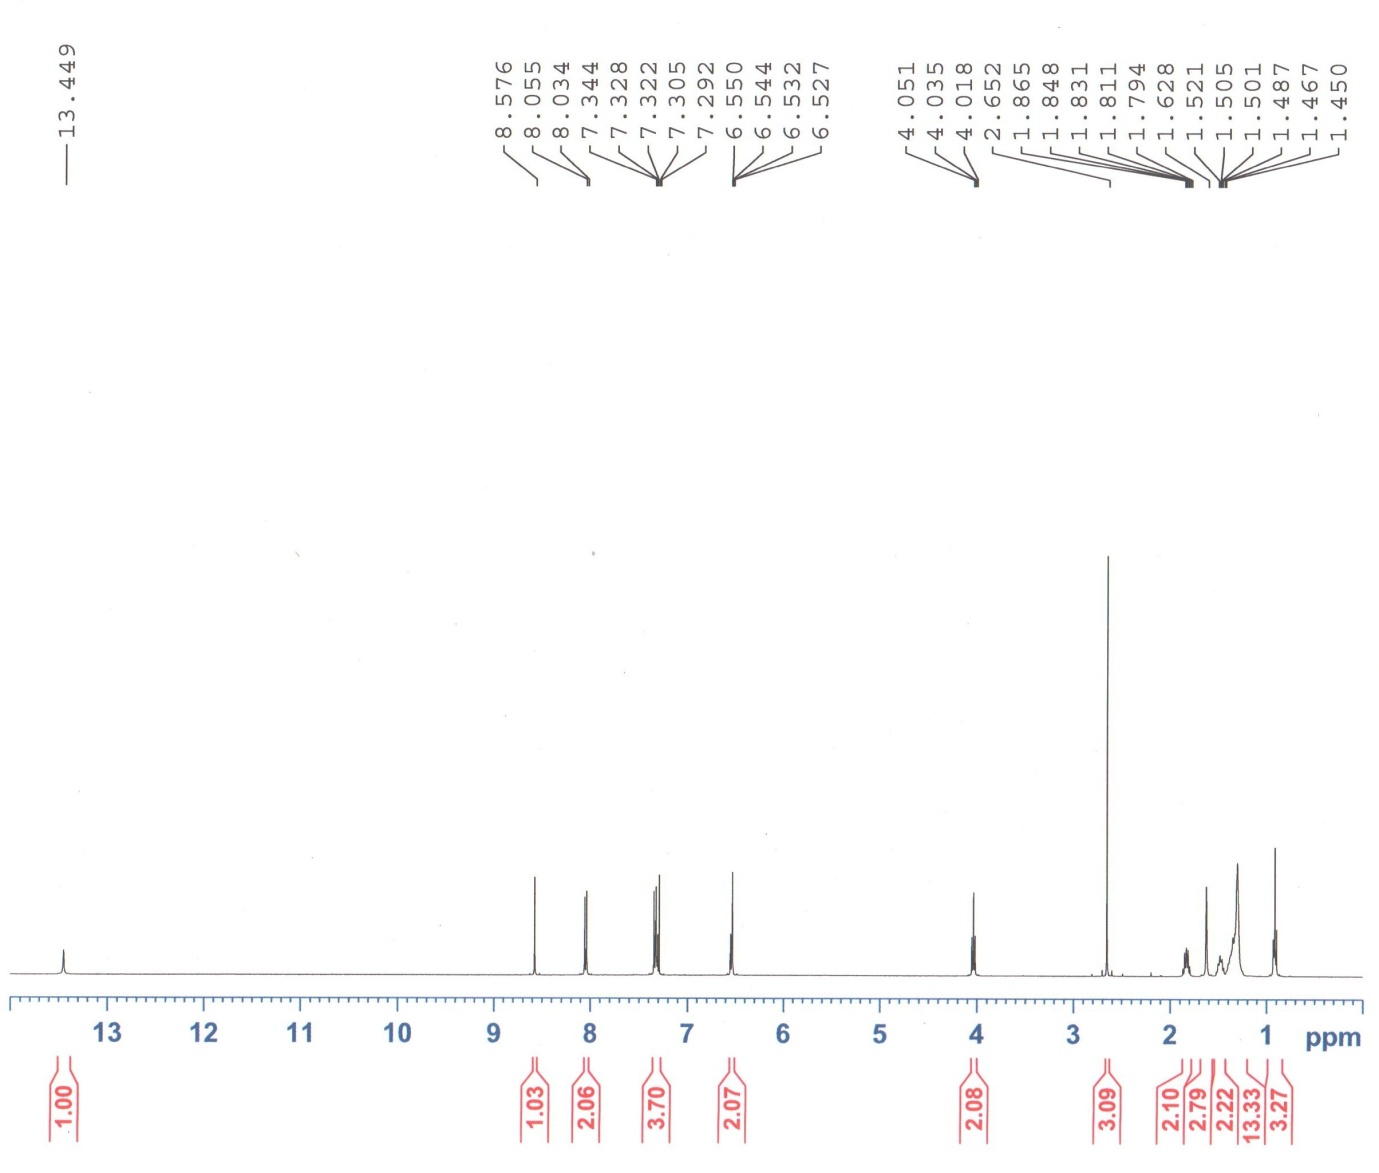


**Figure S4**. 1H NMR of A-10.


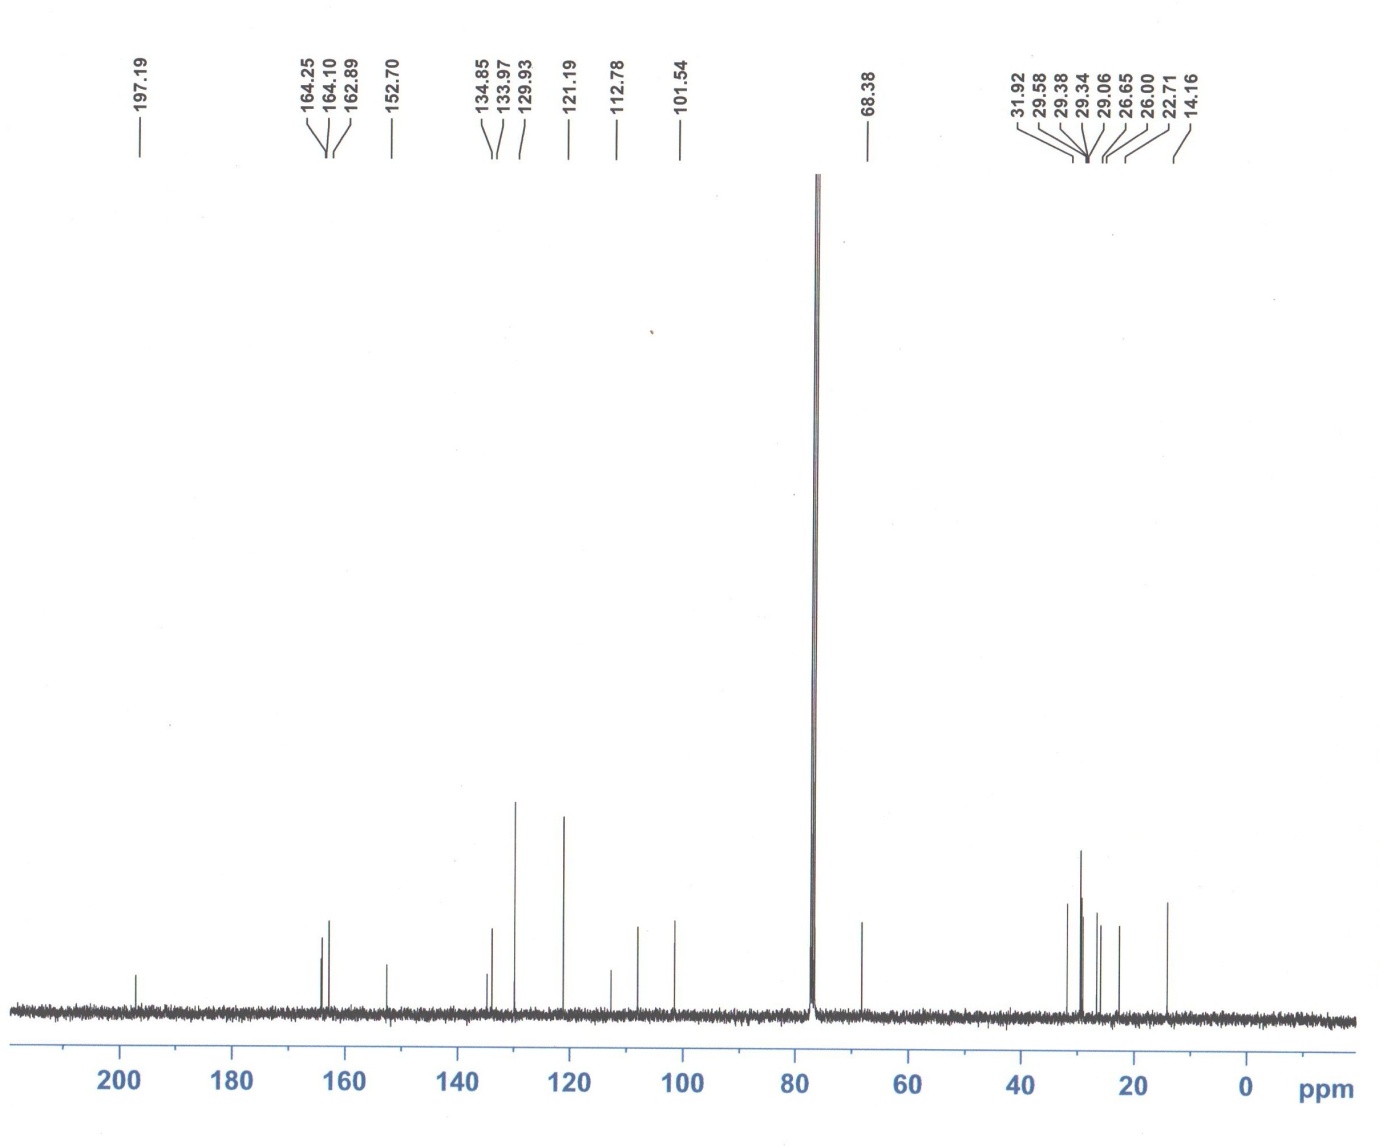


**Figure S5**. 13C NMR of A-10.


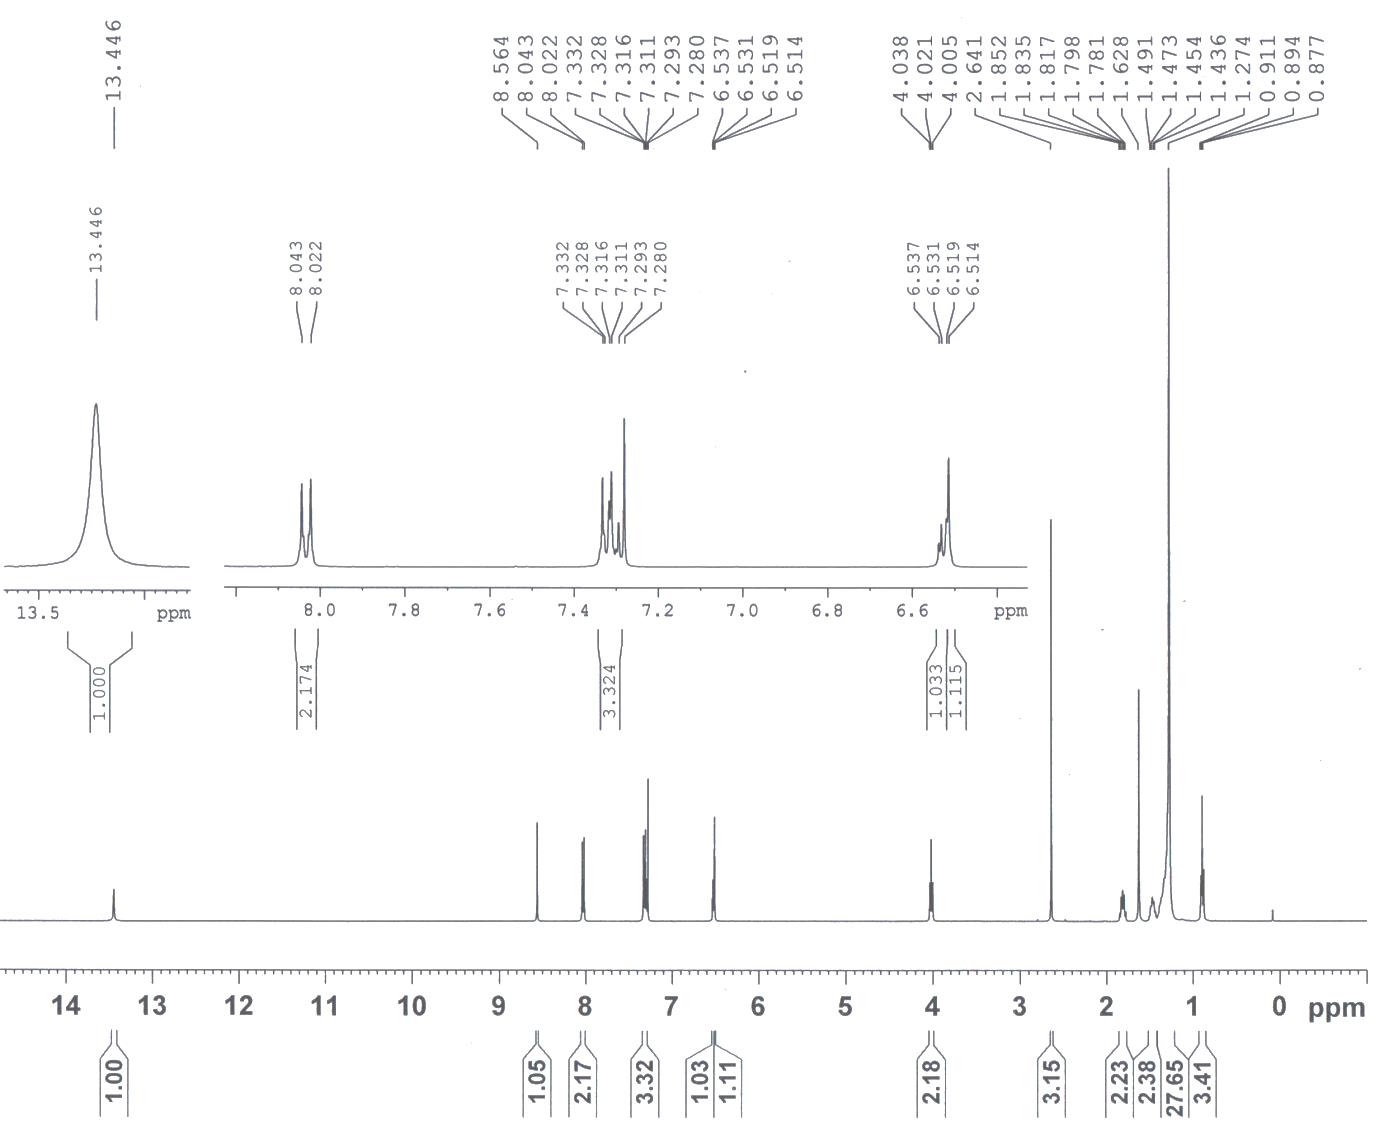


**Figure S6**. 1H NMR of A-16.


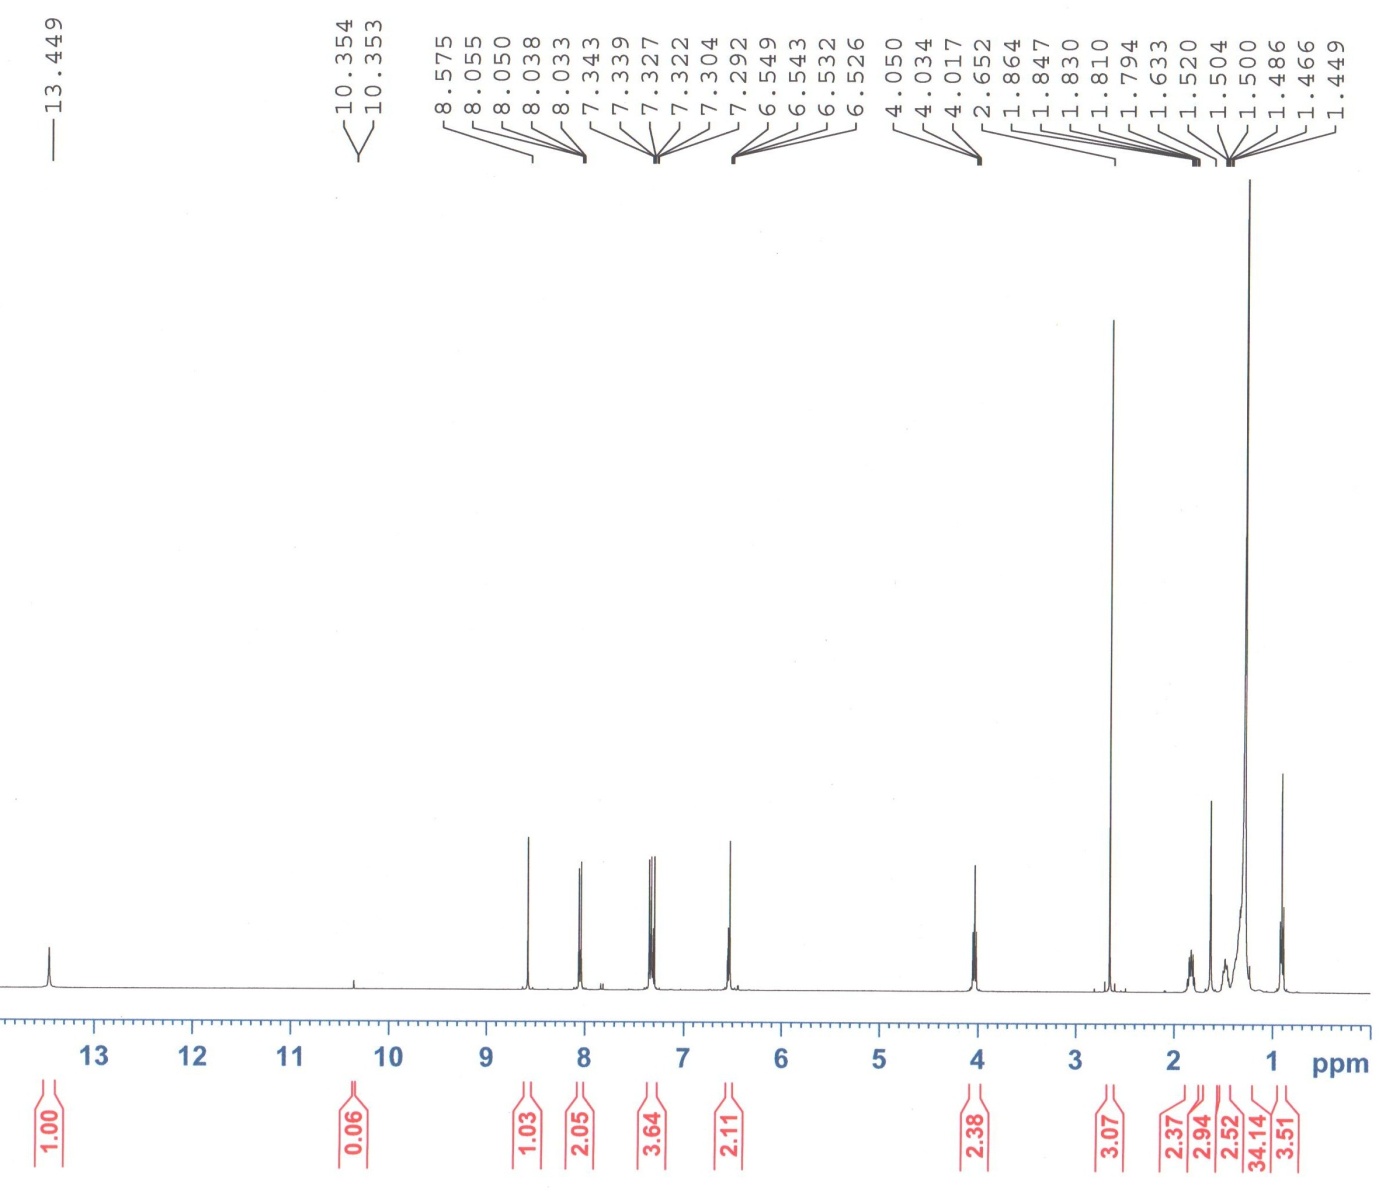


**Figure S7**. 1H NMR of A-18.


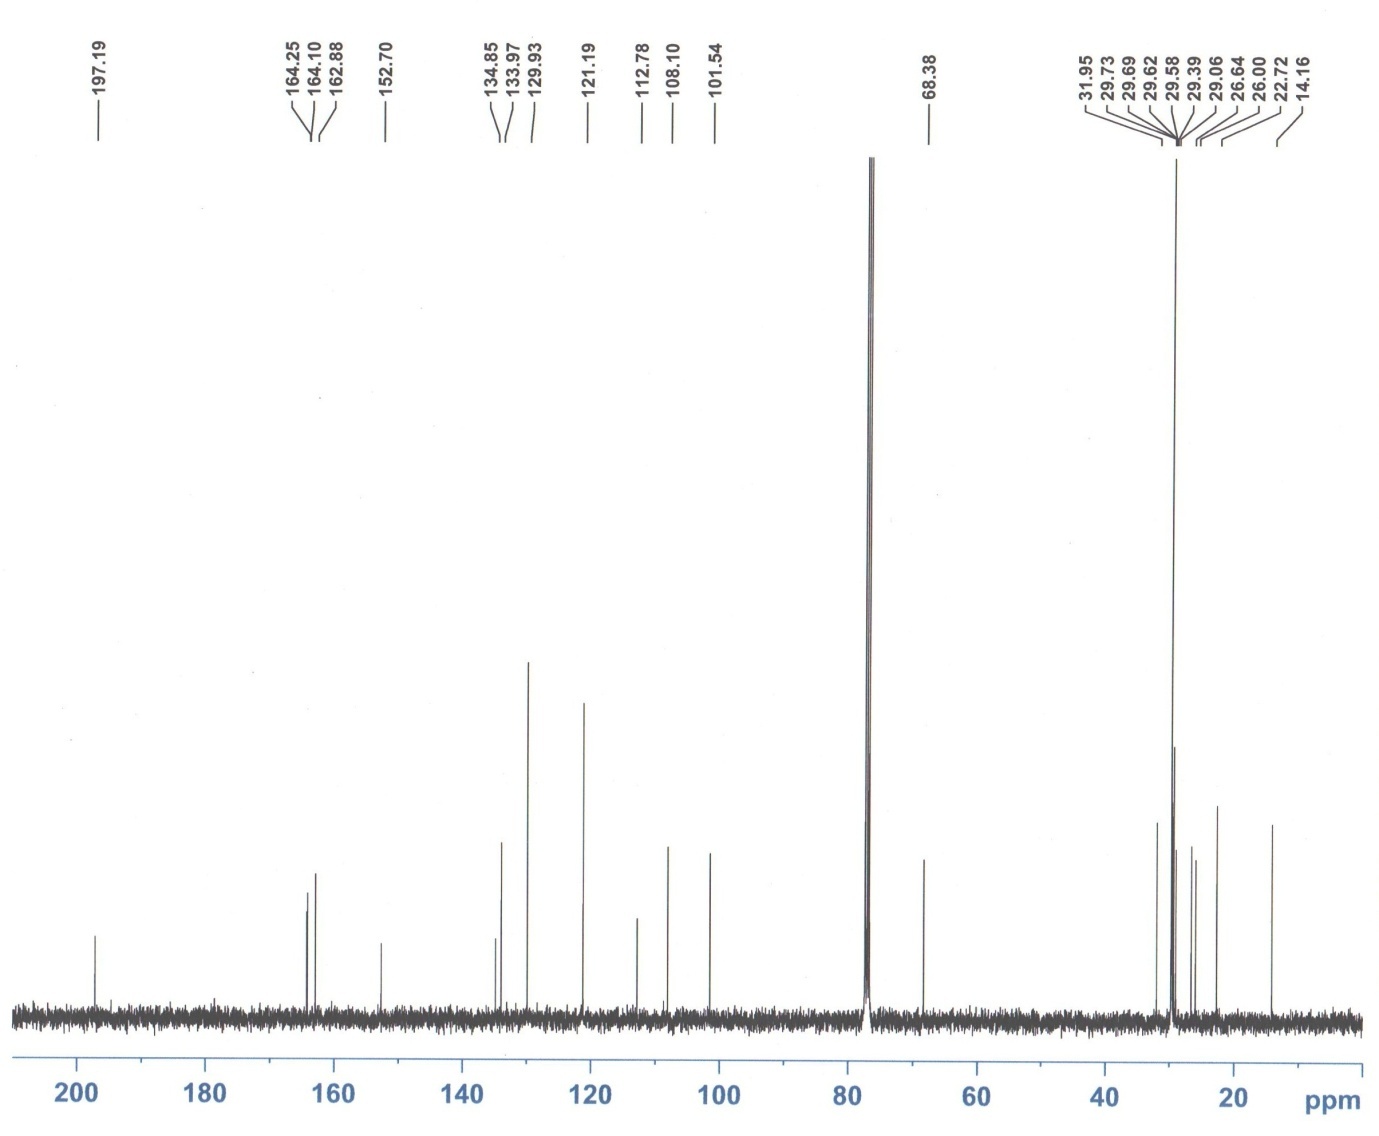


**Figure S8**. 13C NMR of A-18.

**Figure S9**. IR spectra of 2-Hydroxy-4-(octyloxy)benzaldehyde.

**Figure S10**. IR spectra of A-8.

**Figure S11**. IR spectra of B-8-Cu.

**Figure S12**. IR spectra of A-10.

**Figure S13**. IR spectra of B-10-Cu.

**Figure S14**. IR spectra of A-16.

Figure. S15 IR spectra of B-16-Cu.

Figure. S16 IR spectra of A-18.

Figure. S9 IR spectra of B-18-Cu.
